# Supplementary material for: Comparative Genomic Analysis of Human Fungal Pathogens Causing Paracoccidioidomycosis
Source: PLoS Genet. 2011 Oct 27;7(10):e1002345. doi: 10.1371/journal.pgen.1002345 (PMC3203195; doi:10.1371/journal.pgen.1002345)
Supplement: Table S6 — Gene Ontology (GO) terms significantly over- or under-represented. (XLS) [file pgen.1002345.s011.xls]

## Sheet: Sheet1
Table S6. Process and function Gene Ontology (GO) terms significantly over- or under-represented in group versus group comparisons.
Group 1*	Group 2*	GO Term	# in Group 1	# in Group 2	Corrected P-value^	Relative Proportion	GO Term Name
Dimorphic Fungi	Non-Dimorphic Fungi	GO:0055114	3358	5741	2.83e-71	0.68	oxidation reduction
Dimorphic Fungi	Non-Dimorphic Fungi	GO:0055085	2431	4053	5.06e-43	0.7	transmembrane transport
Dimorphic Fungi	Non-Dimorphic Fungi	GO:0051591	7	173	1.03e-33	0.05	response to cAMP
Dimorphic Fungi	Non-Dimorphic Fungi	GO:0005524	4558	4085	4.33e-33	1.3	ATP binding
Dimorphic Fungi	Non-Dimorphic Fungi	GO:0003700	1046	1897	3.48e-28	0.64	transcription factor activity
Dimorphic Fungi	Non-Dimorphic Fungi	GO:0030248	0	111	7.66e-27	0	cellulose binding
Dimorphic Fungi	Non-Dimorphic Fungi	GO:0009405	66	288	1.06e-23	0.27	pathogenesis
Dimorphic Fungi	Non-Dimorphic Fungi	GO:0006355	1384	2297	1.64e-22	0.7	regulation of transcription, DNA-dependent
Dimorphic Fungi	Non-Dimorphic Fungi	GO:0006468	1357	1031	2.01e-22	1.54	protein amino acid phosphorylation
Dimorphic Fungi	Non-Dimorphic Fungi	GO:0045493	0	83	2.59e-19	0	xylan catabolic process
Dimorphic Fungi	Non-Dimorphic Fungi	GO:0052051	9	117	3.95e-18	0.09	interaction with host via protein secreted by type II secretion system
Dimorphic Fungi	Non-Dimorphic Fungi	GO:0009847	1	82	1.52e-17	0.01	spore germination
Dimorphic Fungi	Non-Dimorphic Fungi	GO:0005515	2838	2594	1.62e-16	1.28	protein binding
Dimorphic Fungi	Non-Dimorphic Fungi	GO:0004650	0	59	6.64e-13	0	polygalacturonase activity
Dimorphic Fungi	Non-Dimorphic Fungi	GO:0016616	490	897	1.14e-12	0.64	oxidoreductase activity, acting on the CH-OH group of donors, NAD or NADP as acceptor
Dimorphic Fungi	Non-Dimorphic Fungi	GO:0008810	1	61	4.83e-12	0.02	cellulase activity
Dimorphic Fungi	Non-Dimorphic Fungi	GO:0030437	8	81	1.63e-10	0.12	ascospore formation
Dimorphic Fungi	Non-Dimorphic Fungi	GO:0018658	0	46	1.72e-09	0	salicylate 1-monooxygenase activity
Dimorphic Fungi	Non-Dimorphic Fungi	GO:0048315	0	45	3.22e-09	0	conidium formation
Dimorphic Fungi	Non-Dimorphic Fungi	GO:0004674	879	722	6.89e-09	1.42	protein serine/threonine kinase activity
Dimorphic Fungi	Non-Dimorphic Fungi	GO:0006412	1091	945	4.9e-08	1.35	translation
Dimorphic Fungi	Non-Dimorphic Fungi	GO:0016874	1537	1406	9.58e-08	1.28	ligase activity
Dimorphic Fungi	Non-Dimorphic Fungi	GO:0021700	5	59	1.14e-07	0.1	developmental maturation
Dimorphic Fungi	Non-Dimorphic Fungi	GO:0007047	24	106	1.71e-07	0.26	cellular cell wall organization
Dimorphic Fungi	Non-Dimorphic Fungi	GO:0020037	622	1000	8.39e-07	0.73	heme binding
Dimorphic Fungi	Non-Dimorphic Fungi	GO:0004091	136	300	8.43e-07	0.53	carboxylesterase activity
Dimorphic Fungi	Non-Dimorphic Fungi	GO:0008270	3503	4688	1.33e-06	0.87	zinc ion binding
Dimorphic Fungi	Non-Dimorphic Fungi	GO:0050660	614	983	1.92e-06	0.73	FAD binding
Dimorphic Fungi	Non-Dimorphic Fungi	GO:0030245	0	34	3.35e-06	0	cellulose catabolic process
Dimorphic Fungi	Non-Dimorphic Fungi	GO:0008643	186	372	3.64e-06	0.58	carbohydrate transport
Dimorphic Fungi	Non-Dimorphic Fungi	GO:0004565	0	33	6.36e-06	0	beta-galactosidase activity
Dimorphic Fungi	Non-Dimorphic Fungi	GO:0031176	0	33	6.36e-06	0	endo-1,4-beta-xylanase activity
Dimorphic Fungi	Non-Dimorphic Fungi	GO:0044409	0	33	6.36e-06	0	entry into host
Dimorphic Fungi	Non-Dimorphic Fungi	GO:0019120	1	36	1.55e-05	0.03	hydrolase activity, acting on acid halide bonds, in C-halide compounds
Dimorphic Fungi	Non-Dimorphic Fungi	GO:0009055	627	980	3.03e-05	0.75	electron carrier activity
Dimorphic Fungi	Non-Dimorphic Fungi	GO:0006350	416	691	3.19e-05	0.7	transcription
Dimorphic Fungi	Non-Dimorphic Fungi	GO:0006259	1313	1237	0.000188238	1.24	DNA metabolic process
Dimorphic Fungi	Non-Dimorphic Fungi	GO:0000036	146	289	0.000497875	0.59	acyl carrier activity
Dimorphic Fungi	Non-Dimorphic Fungi	GO:0005525	789	704	0.000667477	1.31	GTP binding
Dimorphic Fungi	Non-Dimorphic Fungi	GO:0008171	62	154	0.000865434	0.47	O-methyltransferase activity
Dimorphic Fungi	Non-Dimorphic Fungi	GO:0016298	117	242	0.000877077	0.56	lipase activity
Dimorphic Fungi	Non-Dimorphic Fungi	GO:0046556	3	36	0.00121418	0.1	alpha-N-arabinofuranosidase activity
Dimorphic Fungi	Non-Dimorphic Fungi	GO:0005871	2	32	0.00137116	0.07	kinesin complex
Dimorphic Fungi	Non-Dimorphic Fungi	GO:0003743	441	360	0.00160729	1.43	translation initiation factor activity
Dimorphic Fungi	Non-Dimorphic Fungi	GO:0030448	0	24	0.0022918	0	hyphal growth
Dimorphic Fungi	Non-Dimorphic Fungi	GO:0050790	233	166	0.0036589	1.64	regulation of catalytic activity
Dimorphic Fungi	Non-Dimorphic Fungi	GO:0004558	0	23	0.00446644	0	alpha-glucosidase activity
Dimorphic Fungi	Non-Dimorphic Fungi	GO:0030570	0	23	0.00446644	0	pectate lyase activity
Dimorphic Fungi	Non-Dimorphic Fungi	GO:0008422	13	57	0.00668369	0.27	beta-glucosidase activity
Dimorphic Fungi	Non-Dimorphic Fungi	GO:0004190	48	122	0.00809169	0.46	aspartic-type endopeptidase activity
Dimorphic Fungi	Non-Dimorphic Fungi	GO:0016854	26	81	0.014523	0.37	racemase and epimerase activity
Dimorphic Fungi	Non-Dimorphic Fungi	GO:0030234	450	381	0.0149064	1.38	enzyme regulator activity
Dimorphic Fungi	Non-Dimorphic Fungi	GO:0031177	85	180	0.0165462	0.55	phosphopantetheine binding
Dimorphic Fungi	Non-Dimorphic Fungi	GO:0009044	0	21	0.0170824	0	xylan 1,4-beta-xylosidase activity
Dimorphic Fungi	Non-Dimorphic Fungi	GO:0006511	316	254	0.0354537	1.45	ubiquitin-dependent protein catabolic process
Dimorphic Fungi	Non-Dimorphic Fungi	GO:0016810	375	586	0.0371562	0.75	hydrolase activity, acting on carbon-nitrogen (but not peptide) bonds
Dimorphic Fungi	Non-Dimorphic Fungi	GO:0008026	464	401	0.0375002	1.35	ATP-dependent helicase activity
Dimorphic Fungi	Non-Dimorphic Fungi	GO:0019566	3	30	0.0382583	0.12	arabinose metabolic process
Dimorphic Fungi	Non-Dimorphic Fungi	GO:0005342	227	382	0.0395995	0.69	organic acid transmembrane transporter activity
Dimorphic Fungi	Non-Dimorphic Fungi	GO:0006582	1	23	0.0422481	0.05	melanin metabolic process
Pb + Hc	Ci + Cp + Ur + Ms	GO:0008270	1890	1613	4e-08	1.25	zinc ion binding
Pb + Hc	Ci + Cp + Ur + Ms	GO:0043086	8	53	1.95e-05	0.16	negative regulation of catalytic activity
Pb + Hc	Ci + Cp + Ur + Ms	GO:0009405	11	55	0.000218067	0.21	pathogenesis
Pb + Hc	Ci + Cp + Ur + Ms	GO:0042802	16	61	0.00207001	0.28	identical protein binding
Pb + Hc	Ci + Cp + Ur + Ms	GO:0003677	1747	1588	0.00605449	1.17	DNA binding
*Taxon abbreviations are as follows: Pb = Paracoccidioides brasiliensis; Hc = Histoplasma capsulatum; Ci = Coccidioides immitis; Cp = Coccidioides posadasii; Ms = Microsporum gypseum; Ur = Uncinocarpus reesii.
^P-values were calculated using Fisher’s exact test and the Bonferonni correction. Relative proportion shows the observed ratio of dimorphic genes/non-dimorphic genes divided by the null expected ratio.
