# Supplementary material for: Comparative Genomic Analysis of Human Fungal Pathogens Causing Paracoccidioidomycosis
Source: PLoS Genet. 2011 Oct 27;7(10):e1002345. doi: 10.1371/journal.pgen.1002345 (PMC3203195; doi:10.1371/journal.pgen.1002345)
Supplement: Table S7 — CAZY carbohydrate active enzyme classification counts for 15 fungal genomes. (XLS) [file pgen.1002345.s012.xls]

## Sheet: Sheet1
Table S7. CAZY carbohydrate active enzyme classificationcounts for 15 fungal genomes.
Family	Aspergillus fumigatus	Aspergillus flavus	Aspergillus nidulans	Coccidioides immitus	Coccidioides posadasii	Fusarium Oxysporum	Histoplasma Capsulatum	Magnaportha grisea	Microsporum gyspseum	Neurospora crassa	Penicillium chrysogenum	Paracoccidioides lutzii	Paracoccidioides brasiliensis 03	Paracoccidioides brasiliensis 18	Uncinocarpus reesi
Carbohydrate Esterase Family 1	4	8	4	2	2	3	2	8	2	8	3	1	2	2	2
Carbohydrate Esterase Family 10	6	10	8	5	4	7	4	6	3	4	6	4	4	4	5
Carbohydrate Esterase Family 12	2	4	2	0	0	3	0	2	0	1	2	0	0	0	0
Carbohydrate Esterase Family 15	1	0	0	0	0	0	0	1	0	1	1	0	0	0	0
Carbohydrate Esterase Family 16	2	3	3	0	0	0	1	2	0	0	2	1	1	1	0
Carbohydrate Esterase Family 2	0	0	0	0	0	1	0	1	0	0	0	0	0	0	0
Carbohydrate Esterase Family 3	2	3	6	0	0	0	0	5	2	3	3	0	0	0	0
Carbohydrate Esterase Family 4	5	3	8	2	2	5	2	8	1	4	7	2	2	2	2
Carbohydrate Esterase Family 5	4	4	4	0	0	1	0	15	0	2	4	0	0	0	0
Carbohydrate Esterase Family 8	3	5	2	0	0	2	0	1	0	1	2	0	0	0	0
Carbohydrate Esterase Family 9	2	2	1	1	1	2	1	2	1	2	1	1	1	1	1
Non-classified Carbohydrate Esterases	0	1	2	0	0	0	0	0	0	1	1	0	0	0	0
Glycoside Hydrolase Family	0	0	0	0	0	2	0	0	0	0	0	0	0	0	0
Glycoside Hydrolase Family 1	5	3	3	0	0	6	0	2	0	1	3	0	0	0	0
Glycoside Hydrolase Family 10	4	4	3	0	0	5	0	6	0	4	3	0	0	0	0
Glycoside Hydrolase Family 105	2	4	4	0	0	3	0	3	0	1	2	0	0	0	0
Glycoside Hydrolase Family 11	3	4	2	0	0	3	0	5	0	2	1	0	0	0	0
Glycoside Hydrolase Family 114	1	1	2	0	0	1	0	0	0	1	2	0	0	0	0
Glycoside Hydrolase Family 115	1	3	1	0	0	2	0	3	0	1	0	0	0	0	0
Glycoside Hydrolase Family 12	3	4	1	0	0	2	0	2	0	1	3	0	0	0	0
Glycoside Hydrolase Family 13	14	13	12	5	5	12	6	11	4	10	13	5	5	5	5
Glycoside Hydrolase Family 15	4	3	2	1	1	3	1	2	1	2	3	1	1	1	1
Glycoside Hydrolase Family 16	11	12	15	6	3	18	4	17	6	15	15	3	3	3	5
Glycoside Hydrolase Family 17	5	4	6	2	2	5	2	7	3	4	5	4	4	4	3
Glycoside Hydrolase Family 18	15	13	15	10	10	19	7	12	13	11	8	2	3	3	9
Glycoside Hydrolase Family 2	8	10	12	2	2	9	1	9	3	5	8	1	1	2	3
Glycoside Hydrolase Family 20	3	3	2	3	2	4	3	4	2	1	2	3	3	3	3
Glycoside Hydrolase Family 24	0	2	1	0	0	0	0	1	0	0	0	0	0	0	0
Glycoside Hydrolase Family 25	2	1	3	0	0	0	0	0	1	1	1	0	0	0	0
Glycoside Hydrolase Family 26	0	1	3	0	0	0	0	0	0	1	1	0	0	0	0
Glycoside Hydrolase Family 27	4	2	3	0	0	3	0	3	0	0	1	1	1	1	0
Glycoside Hydrolase Family 28	15	23	13	1	1	16	0	4	0	2	6	1	1	1	1
Glycoside Hydrolase Family 29	0	0	0	0	0	2	0	4	0	0	0	0	0	0	0
Glycoside Hydrolase Family 3	18	25	23	7	5	33	5	18	7	9	18	4	4	4	5
Glycoside Hydrolase Family 30	1	0	0	0	0	0	0	3	0	1	1	0	0	0	0
Glycoside Hydrolase Family 31	6	10	11	1	2	9	3	6	2	5	11	1	1	1	1
Glycoside Hydrolase Family 32	4	4	3	0	0	9	0	4	0	0	7	0	0	0	0
Glycoside Hydrolase Family 33	0	0	0	0	0	0	0	0	0	0	1	0	0	0	0
Glycoside Hydrolase Family 35	5	7	4	0	0	7	0	0	0	2	3	0	0	0	0
Glycoside Hydrolase Family 36	3	3	4	1	1	3	1	2	1	1	2	2	1	1	1
Glycoside Hydrolase Family 37	1	1	1	1	1	2	2	2	1	2	1	2	2	2	1
Glycoside Hydrolase Family 38	1	2	2	1	1	6	1	5	1	1	6	1	1	1	1
Glycoside Hydrolase Family 39	1	0	1	0	0	4	0	1	0	0	1	0	0	0	0
Glycoside Hydrolase Family 42	0	0	0	0	0	0	0	0	0	0	1	0	0	0	0
Glycoside Hydrolase Family 43	18	20	15	1	1	23	1	18	3	8	15	0	1	1	1
Glycoside Hydrolase Family 45	0	0	1	0	0	1	0	1	0	1	0	0	0	0	0
Glycoside Hydrolase Family 47	6	6	8	7	7	11	9	10	7	9	7	7	7	7	7
Glycoside Hydrolase Family 49	0	0	0	0	0	1	0	0	0	0	0	0	0	0	0
Glycoside Hydrolase Family 5	13	14	15	2	2	18	3	13	3	8	13	3	3	3	2
Glycoside Hydrolase Family 51	2	4	3	0	0	3	0	3	0	1	3	1	1	1	0
Glycoside Hydrolase Family 53	1	2	1	0	0	2	0	1	0	1	1	0	0	0	0
Glycoside Hydrolase Family 54	1	1	1	0	0	1	0	1	0	1	1	0	0	0	0
Glycoside Hydrolase Family 55	6	3	6	1	1	3	4	4	1	6	3	4	5	4	2
Glycoside Hydrolase Family 6	1	1	2	0	0	1	0	3	0	3	1	0	0	0	0
Glycoside Hydrolase Family 61	5	5	7	0	0	7	0	15	0	9	4	0	0	0	0
Glycoside Hydrolase Family 62	2	2	2	0	0	1	0	3	0	0	1	0	0	0	0
Glycoside Hydrolase Family 63	1	1	1	1	1	1	1	2	1	1	1	1	1	1	1
Glycoside Hydrolase Family 64	0	0	0	0	0	3	0	2	0	2	2	0	0	0	0
Glycoside Hydrolase Family 65	1	1	1	1	1	1	1	0	1	0	1	1	1	1	1
Glycoside Hydrolase Family 67	1	1	1	0	0	2	0	1	0	1	1	0	0	0	0
Glycoside Hydrolase Family 7	4	3	3	0	0	2	0	6	0	5	2	0	0	0	0
Glycoside Hydrolase Family 71	10	11	8	3	3	4	4	4	2	8	9	4	2	4	4
Glycoside Hydrolase Family 72	7	8	5	5	4	3	4	5	4	5	6	4	4	4	4
Glycoside Hydrolase Family 74	1	0	2	0	0	1	0	1	0	1	0	0	0	0	0
Glycoside Hydrolase Family 75	3	4	1	0	0	1	0	1	0	1	1	0	0	0	0
Glycoside Hydrolase Family 76	8	12	8	4	4	9	3	8	3	10	9	5	4	5	4
Glycoside Hydrolase Family 78	6	16	11	1	1	17	0	3	0	1	7	0	0	0	0
Glycoside Hydrolase Family 79	0	4	1	0	0	5	0	2	0	2	2	0	0	0	0
Glycoside Hydrolase Family 81	1	1	1	1	1	1	1	2	1	1	1	1	1	1	1
Glycoside Hydrolase Family 84	0	0	0	0	0	0	1	0	0	0	1	0	0	0	0
Glycoside Hydrolase Family 88	2	3	2	0	0	2	0	1	0	0	0	0	0	0	0
Glycoside Hydrolase Family 89	1	1	0	0	0	0	0	0	0	0	0	0	0	0	0
Glycoside Hydrolase Family 92	5	7	6	1	0	0	1	6	2	2	5	1	1	1	2
Glycoside Hydrolase Family 93	4	3	3	0	0	6	2	2	0	3	3	0	0	0	1
Glycoside Hydrolase Family 94	0	0	0	0	0	0	0	1	0	1	0	0	0	0	0
Glycoside Hydrolase Family 95	2	2	3	0	0	2	0	1	0	0	1	0	0	0	0
Non-classified Glycoside Hydrolases	4	8	5	3	3	4	2	3	2	4	6	2	2	2	3
GlycosylTransferase Family	1	0	0	0	0	0	0	0	0	0	0	0	0	0	0
GlycosylTransferase Family 1	6	10	8	3	3	10	1	10	1	5	7	2	2	3	2
GlycosylTransferase Family 15	3	3	3	4	3	3	3	4	3	5	3	3	3	3	3
GlycosylTransferase Family 17	0	0	0	0	0	1	1	1	0	1	0	0	0	0	0
GlycosylTransferase Family 2	17	21	16	16	15	20	13	14	13	15	17	13	13	13	12
GlycosylTransferase Family 20	8	7	5	3	3	3	3	3	4	3	10	3	2	2	4
GlycosylTransferase Family 21	1	1	1	1	1	1	1	1	1	1	1	1	1	1	1
GlycosylTransferase Family 22	5	5	6	6	4	5	3	5	4	4	5	2	3	4	4
GlycosylTransferase Family 24	1	1	1	1	1	1	1	1	1	1	1	1	1	1	1
GlycosylTransferase Family 25	3	6	5	0	0	0	0	7	0	1	4	0	0	0	0
GlycosylTransferase Family 3	1	1	1	2	1	1	1	1	1	1	1	1	1	1	1
GlycosylTransferase Family 30	1	1	1	1	1	1	1	1	1	1	1	1	0	1	1
GlycosylTransferase Family 31	8	13	8	4	2	4	1	5	3	4	5	2	2	2	4
GlycosylTransferase Family 32	7	8	8	2	2	3	1	9	4	4	7	4	4	4	2
GlycosylTransferase Family 33	0	1	1	1	1	1	1	1	1	1	1	0	1	1	0
GlycosylTransferase Family 34	2	4	5	2	2	3	2	2	1	2	5	2	2	2	1
GlycosylTransferase Family 35	1	1	1	1	1	1	1	1	1	1	1	1	1	1	1
GlycosylTransferase Family 39	3	3	3	3	3	3	3	3	3	3	3	3	3	3	3
GlycosylTransferase Family 4	8	10	7	4	4	9	4	4	4	6	6	3	4	4	4
GlycosylTransferase Family 41	1	1	1	1	2	1	1	1	1	1	1	1	1	1	1
GlycosylTransferase Family 47	1	1	1	1	1	1	1	1	1	1	1	1	1	1	1
GlycosylTransferase Family 48	1	1	1	1	1	1	1	1	1	1	1	1	1	1	2
GlycosylTransferase Family 5	3	3	2	1	1	0	1	1	0	2	4	1	1	1	1
GlycosylTransferase Family 50	1	1	1	1	1	1	1	1	1	1	1	1	1	1	0
GlycosylTransferase Family 55	1	1	2	0	0	0	0	2	0	1	1	0	0	0	0
GlycosylTransferase Family 57	2	2	2	2	2	2	2	2	2	2	2	2	1	1	2
GlycosylTransferase Family 58	1	1	1	1	1	1	1	1	1	1	1	1	1	1	0
GlycosylTransferase Family 59	1	1	1	1	1	1	1	1	1	1	1	1	1	1	0
GlycosylTransferase Family 61	1	0	0	0	0	0	0	3	0	0	0	0	0	0	0
GlycosylTransferase Family 62	3	4	4	3	3	3	2	3	3	3	4	3	3	3	3
GlycosylTransferase Family 66	1	1	1	1	1	1	1	1	1	1	1	1	1	1	1
GlycosylTransferase Family 69	2	4	4	4	4	4	2	4	3	2	2	2	2	2	4
GlycosylTransferase Family 71	2	5	2	4	4	3	3	4	1	1	2	3	3	3	3
GlycosylTransferase Family 76	1	0	1	1	0	1	1	1	0	1	1	0	0	0	0
GlycosylTransferase Family 8	4	5	5	3	2	4	2	2	1	2	5	1	2	2	2
GlycosylTransferase Family 90	5	4	2	4	4	6	2	4	4	4	6	2	2	2	2
Non-classified GlycosylTransferases	5	5	5	3	4	5	1	2	3	3	6	1	1	1	5
Polysaccharide Lyase Family 1	7	13	9	0	0	8	0	1	0	0	6	0	0	0	0
Polysaccharide Lyase Family 11	0	0	1	0	0	1	0	0	0	0	0	0	0	0	0
Polysaccharide Lyase Family 20	1	2	2	0	0	0	0	1	0	1	0	0	0	0	0
Polysaccharide Lyase Family 3	3	3	5	0	0	4	0	1	0	1	1	0	0	0	0
Polysaccharide Lyase Family 4	4	3	5	0	0	3	0	1	0	1	3	0	0	0	0
Polysaccharide Lyase Family 7	0	1	0	0	0	0	0	0	0	0	0	0	0	0	0
Polysaccharide Lyase Family 9	1	1	1	0	0	1	0	0	0	0	0	0	0	0	0
